# Supplementary material for: Maternal caffeine consumption and pregnancy outcomes: a narrative review with implications for advice to mothers and mothers-to-be
Source: PubMed Central journal article supplement — BMJ Evid Based Med. 2020 Aug 25;26(3):114–5. doi: 10.1136/bmjebm-2020-111432 (PMC8165152; doi:10.1136/bmjebm-2020-111432), 2020-08-25
Supplement: bmjebm-2020-111432supp001.pdf [file bmjebm-2020-111432supp001.pdf]

**Supplementary Table 1.** Summary of original observational studies of maternal caffeine consumption and pregnancy outcomes published since year 2000.

| Authors                          | Year | Study design       | Country        | N                         | Key findings                                                                                                                                                                                                                                                                                         |
|----------------------------------|------|--------------------|----------------|---------------------------|------------------------------------------------------------------------------------------------------------------------------------------------------------------------------------------------------------------------------------------------------------------------------------------------------|
| <b>Miscarriage</b>               |      |                    |                |                           |                                                                                                                                                                                                                                                                                                      |
| Cnattingius et al. <sup>47</sup> | 2000 | case-control       | Sweden         | 562 cases<br>953 controls | Maternal caffeine consumption associated with increased risk, not confounded by pregnancy-related symptoms, and present in nonsmokers (plasma cotinine confirmed).                                                                                                                                   |
| Wen et al. <sup>48</sup>         | 2001 | prospective cohort | USA            | 650                       | Maternal caffeine consumption associated with increased risk, not confounded by pregnancy-related symptoms. Results for women experiencing and those not experiencing nausea were examined separately, showing caffeine-related ( $\geq 300$ versus $< 20$ mg per day) increased risk in the former. |
| Giannelli et al. <sup>49</sup>   | 2003 | case-control       | United Kingdom | 160 cases<br>314 controls | Maternal caffeine consumption ( $> 300$ mg per day compared to $\leq 150$ mg per day) doubled risk, not confounded by pregnancy-related symptoms, and the majority of participants being nonsmokers.                                                                                                 |
| Khoury et al. <sup>50</sup>      | 2004 | prospective cohort | USA            | 191                       | Maternal caffeine consumption among women with type 1 diabetes associated with a 4.5-fold increased risk, not confounded by smoking status. Caffeine-related risk estimated to be greater than that attributable to smoking.                                                                         |
| Savitz et al. <sup>55</sup>      | 2008 | cross-sectional    | USA            | 2,407                     | “Suggestive” caffeine-related increased risk, discounted due to                                                                                                                                                                                                                                      |

## Caffeine and Pregnancy: A Review

2

|                                    |      |                    |         |                           |  |                                                                                                                                                                                                                                                             |
|------------------------------------|------|--------------------|---------|---------------------------|--|-------------------------------------------------------------------------------------------------------------------------------------------------------------------------------------------------------------------------------------------------------------|
|                                    |      |                    |         |                           |  | suspected recall bias.                                                                                                                                                                                                                                      |
| Weng et al. <sup>51</sup>          | 2008 | prospective cohort | USA     | 1,063                     |  | Maternal caffeine consumption associated with increased risk, more pronounced in nonsmokers, and not confounded by pregnancy-related symptoms.                                                                                                              |
| Stefanidou et al. <sup>52</sup>    | 2011 | case-control       | Italy   | 52 cases<br>260 controls  |  | Maternal caffeine consumption associated with a dose-response increased risk of <i>sine causa</i> recurrent miscarriage of nearly 3-fold for each 100 mg increase in daily caffeine intake, not confounded by pregnancy-related symptoms or smoking status. |
| Gaskins et al. <sup>53</sup>       | 2018 | prospective cohort | USA     | 11,072                    |  | Maternal caffeine consumption (average less than ACOG-advised limit) associated with increased risk, including never smokers, and not confounded by pregnancy-related symptoms.                                                                             |
| Purdue-Smithe et al. <sup>54</sup> | 2019 | prospective cohort | USA     | 1,228                     |  | Maternal caffeine consumption (biomarker confirmed) associated with increased risk, with no minimum safe threshold of consumption, and not confounded by pregnancy-related symptoms.                                                                        |
| <b>Stillbirth</b>                  |      |                    |         |                           |  |                                                                                                                                                                                                                                                             |
| Wisborg et al. <sup>60</sup>       | 2003 | prospective cohort | Denmark | 18,478                    |  | Maternal caffeine consumption associated with increased risk, with similar magnitude for smokers and nonsmokers.                                                                                                                                            |
| Bech et al. <sup>61</sup>          | 2006 | cross-sectional    | Denmark | 142 cases<br>157 controls |  | Maternal caffeine consumption associated with increased risk, irrespective of genotype for caffeine metabolism.                                                                                                                                             |

## Caffeine and Pregnancy: A Review

3

|                                   |      |                    |                |                           |                                                                                                                                                                                                                |
|-----------------------------------|------|--------------------|----------------|---------------------------|----------------------------------------------------------------------------------------------------------------------------------------------------------------------------------------------------------------|
| Matijasevich et al. <sup>62</sup> | 2006 | case-control       | Uruguay        | 382 cases<br>792 controls | Maternal caffeine consumption associated with increased risk, with similar magnitude for smokers and nonsmokers, independent of pregnancy-related symptoms.                                                    |
| Greenwood et al. <sup>63</sup>    | 2010 | prospective cohort | United Kingdom | 2,643                     | Compared to maternal consumption of less than 100 mg caffeine per day, 300+ mg per day was associated with a five fold (CI: 1.6–16.4) increased risk, not confounded by smoking or pregnancy-related symptoms. |
| Gaskins et al. <sup>53</sup>      | 2018 | prospective cohort | USA            | 11,072                    | Caffeine consumption not associated with increased risk.                                                                                                                                                       |

**Low Birth Weight (LBW) and/or Small for Gestational Age (SGA)**

|                                |      |                    |        |       |                                                                                                                                                                                                                             |
|--------------------------------|------|--------------------|--------|-------|-----------------------------------------------------------------------------------------------------------------------------------------------------------------------------------------------------------------------------|
| Klebanoff et al. <sup>72</sup> | 2002 | prospective cohort | USA    | 2,515 | Maternal caffeine consumption (biomarker confirmed) associated with increased risk of SGA in women who smoked.                                                                                                              |
| Clausson et al. <sup>73</sup>  | 2002 | prospective cohort | Sweden | 953   | Maternal caffeine consumption unrelated to risk of LBW and SGA.                                                                                                                                                             |
| Bracken et al. <sup>68</sup>   | 2003 | prospective cohort | USA    | 2,291 | Small (28 g) decreased birth weight associated with each increment of 100 mg per day in maternal caffeine.                                                                                                                  |
| CARE Study Group <sup>69</sup> | 2008 | prospective cohort | UK     | 2,635 | Maternal caffeine consumption associated with decreased birth weight, not confounded by smoking status (salivary cotinine confirmed), with no identifiable threshold of consumption below which the association was absent. |

Caffeine and Pregnancy: A Review

4

## Caffeine and Pregnancy: A Review

5

|                                  |      |                    |             |                             |                                                                                                                                              |
|----------------------------------|------|--------------------|-------------|-----------------------------|----------------------------------------------------------------------------------------------------------------------------------------------|
| Bakker et al. <sup>76</sup>      | 2010 | prospective cohort | Netherlands | 7,346                       | Maternal caffeine consumption not associated with LBW. High intake ( $\geq 6$ cups of coffee per day) associated with increased risk of SGA. |
| Sengpiel et al. <sup>74</sup>    | 2013 | prospective cohort | Norway      | 59,123                      | Maternal caffeine consumption associated with LBW and increased risk of SGA.                                                                 |
| Hoyt et al. <sup>4</sup>         | 2014 | case-control       | USA         | 648 cases<br>7,295 controls | Maternal caffeine consumption associated with SGA.                                                                                           |
| Bech et al. <sup>78</sup>        | 2015 | prospective cohort | Denmark     | 71,000                      | Maternal caffeine consumption associated with increased risk of LBW and SGA for both smokers and nonsmokers.                                 |
| Okubo et al. <sup>79</sup>       | 2015 | prospective cohort | Japan       | 858                         | Maternal caffeine consumption associated with neither LBW nor SGA.                                                                           |
| Voerman et al. <sup>70</sup>     | 2016 | prospective cohort | Netherlands | 7,857                       | Maternal caffeine consumption of $\geq 6$ cups of coffee per day versus $< 2$ associated with LBW.                                           |
| Chen et al. <sup>71</sup>        | 2018 | prospective cohort | Ireland     | 941                         | Maternal caffeine consumption associated with LBW, confirmed for both coffee and tea.                                                        |
| Kobayashi et al. <sup>73</sup>   | 2019 | prospective cohort | Japan       | 94,876                      | Maternal caffeine consumption associated with increased SGA risk.                                                                            |
| Modzelewska et al. <sup>74</sup> | 2019 | prospective cohort | Norway      | 67,569                      | Maternal caffeine consumption associated with increased SGA risk.                                                                            |

## Caffeine and Pregnancy: A Review

6

**Preterm Birth**

|                                  |      |                    |       |                             |                                                                                                   |
|----------------------------------|------|--------------------|-------|-----------------------------|---------------------------------------------------------------------------------------------------|
| Bracken et al. <sup>68</sup>     | 2003 | prospective cohort | USA   | 2,291                       | Maternal caffeine consumption not associated with increased risk.                                 |
| Chiaffarino et al. <sup>83</sup> | 2006 | case-control       | Italy | 502 cases<br>1,966 controls | Maternal caffeine consumption not associated with increased risk.                                 |
| Okubo et al. <sup>79</sup>       | 2015 | prospective cohort | Japan | 858                         | Maternal caffeine consumption associated with increased risk.                                     |
| Kobayashi et al. <sup>73</sup>   | 2019 | prospective cohort | Japan | 94,876                      | Increased risk associated with approximate equivalent of >2 cups of coffee per day versus <1 cup. |

**Childhood Acute Leukemia**

|                                  |      |              |           |                             |                                                                                                                                                                                                                                                                                          |
|----------------------------------|------|--------------|-----------|-----------------------------|------------------------------------------------------------------------------------------------------------------------------------------------------------------------------------------------------------------------------------------------------------------------------------------|
| Menegaux et al. <sup>86</sup>    | 2007 | case-control | France    | 472 cases<br>567 controls   | No overall association, but evidence of maternal caffeine consumption of >3 cups per day associated with increased risk among nonsmokers.                                                                                                                                                |
| Milne et al. <sup>89</sup>       | 2011 | case-control | Australia | 337 cases<br>697 controls   | No overall association, but evidence of “higher” levels of maternal caffeine consumption associated with increased risk among nonsmokers. Results of a meta-analysis reported in the same study suggested increased risk in children of nonsmoking mothers (see also Milne et al. 2018). |
| Bonaventure et al. <sup>87</sup> | 2013 | case-control | France    | 764 cases<br>1,681 controls | Maternal caffeine consumption associated with increased risk.                                                                                                                                                                                                                            |

## Caffeine and Pregnancy: A Review

7

|                                  |      |              |                                   |                               |                                                                                                   |
|----------------------------------|------|--------------|-----------------------------------|-------------------------------|---------------------------------------------------------------------------------------------------|
| Orsi et al. <sup>91</sup>        | 2015 | case-control | France                            | 747 cases<br>1,421 controls   | Role of maternal coffee consumption found to be “unclear”.                                        |
| Milne et al. <sup>88</sup>       | 2018 | case-control | Australia, France,<br>Greece, USA | 2,552 cases<br>4,876 controls | Maternal caffeine consumption of >2 cups per day versus no coffee associated with increased risk. |
| Karalexi<br>et al. <sup>90</sup> | 2019 | case-control | France, Greece,<br>Germany, USA   | 554 cases<br>1,419 controls   | Maternal caffeine consumption of >1 cup per day associated with increased risk.                   |

**Childhood Overweight and Obesity**

|                                       |      |                    |             |                               |                                                                                                                          |
|---------------------------------------|------|--------------------|-------------|-------------------------------|--------------------------------------------------------------------------------------------------------------------------|
| Li et al. <sup>99</sup>               | 2015 | prospective cohort | USA         | 615                           | Maternal caffeine consumption associated with a dose-response increased risk of childhood obesity at 15 years follow-up. |
| Klebanoff &<br>Keim. <sup>102</sup>   | 2015 | case-control       | USA         | 1,986 cases<br>1,986 controls | Maternal caffeine consumption not associated with risk of childhood obesity at 4 and 7 years.                            |
| Voerman<br>et al. <sup>70</sup>       | 2016 | prospective cohort | Netherlands | 7,857                         | Maternal caffeine consumption associated with increased risk of childhood overweight at 6 years.                         |
| Papadopoulou<br>et al. <sup>100</sup> | 2018 | prospective cohort | Norway      | 50,943                        | Maternal caffeine consumption associated with increased risk of childhood overweight up to 8 years.                      |
| Chen et al. <sup>101</sup>            | 2019 | prospective cohort | Ireland     | 558                           | Maternal caffeine consumption associated with increased risk of childhood adiposity and obesity at 5 and 9 years.        |
